# Supplementary material for: A synchrotronpowder X-ray diffraction study of the skutterudite-related phases AB1.5Te1.5(A = Co, Rh, Ir; B = Ge, Sn)
Source: Royal Society of Chemistry journal article supplement (doi:10.1039/b913578b), 2009-09-15
Supplement: b913578b.pdf [file b913578b.pdf]

**Electronic Supplementary Information for:**  
**A synchrotron powder X-ray diffraction study of the skutterudite-  
related phases  $AB_{1.5}Te_{1.5}$  (A=Co, Rh, Ir; B= Ge, Sn)**

Paz Vaqueiro,\* Gerard G. Sobany and A.V. Powell

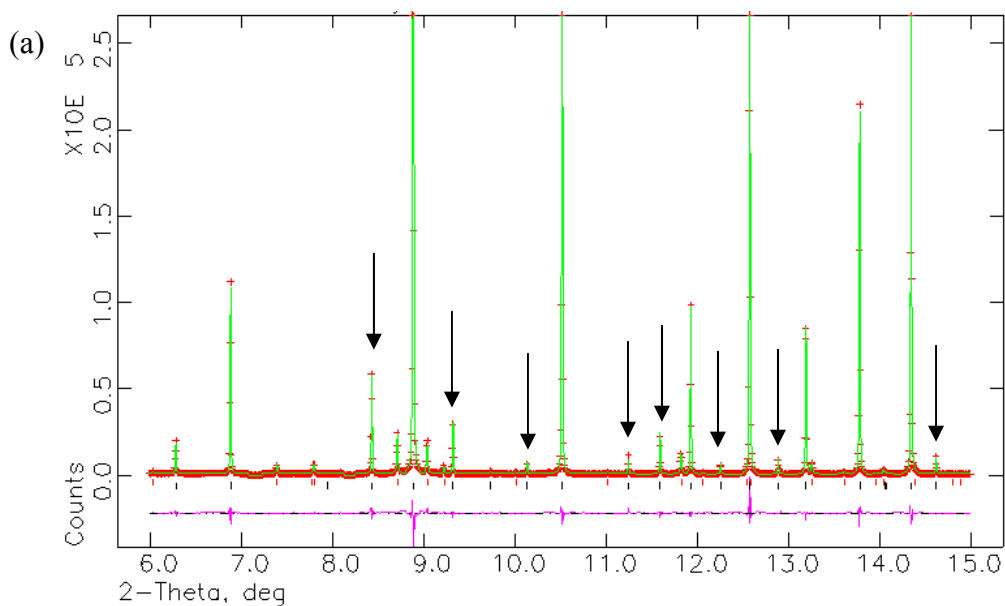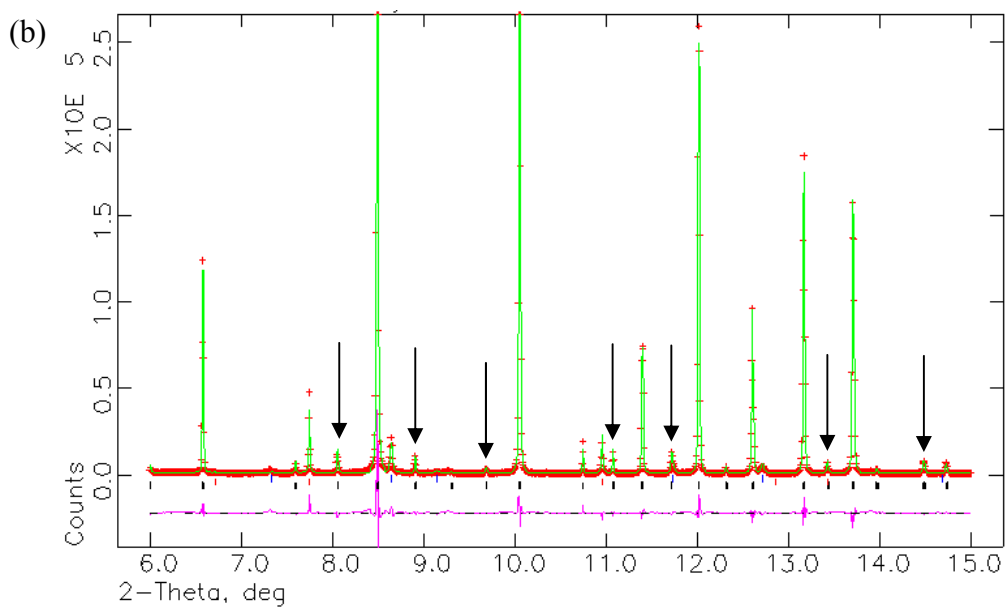

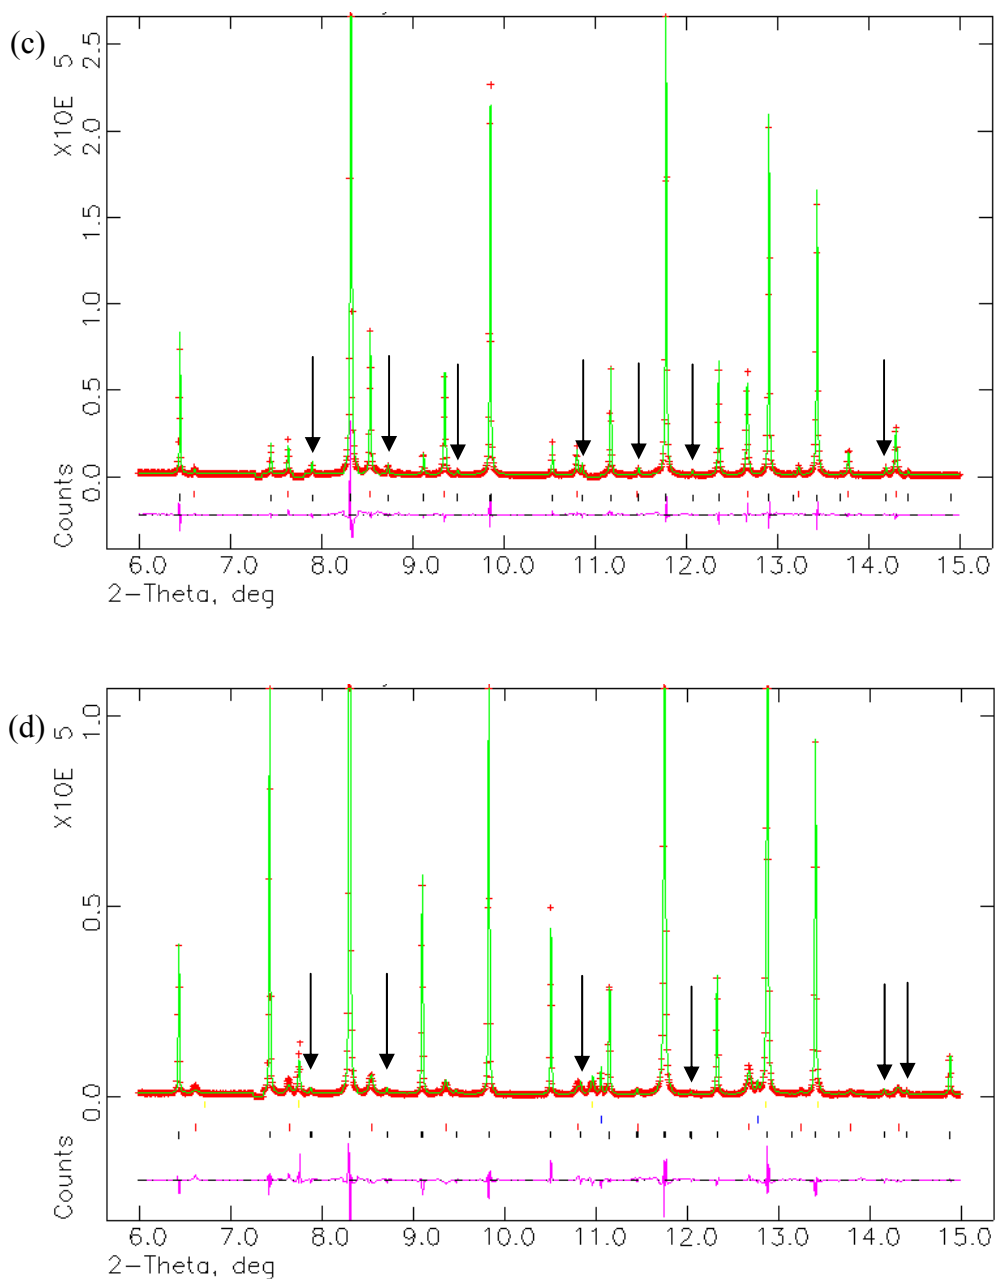

**Figure 1S.** Final observed (crosses), calculated (full line) and difference (lower full line) diffraction profiles ( $\lambda = 0.42704(1) \text{ \AA}$ ) over the  $6\text{-}15^\circ$  region for (a)  $\text{CoGe}_{1.5}\text{Te}_{1.5}$  (b)  $\text{CoSn}_{1.5}\text{Te}_{1.5}$  (c)  $\text{RhSn}_{1.5}\text{Te}_{1.5}$ , and (d)  $\text{IrSn}_{1.5}\text{Te}_{1.5}$ . Reflection positions are marked: the lower markers refer to the skutterudite phase and the upper markers to the impurity phases listed in Table 1. The weak superstructure peaks of the ordered skutterudite structure are highlighted by arrows.

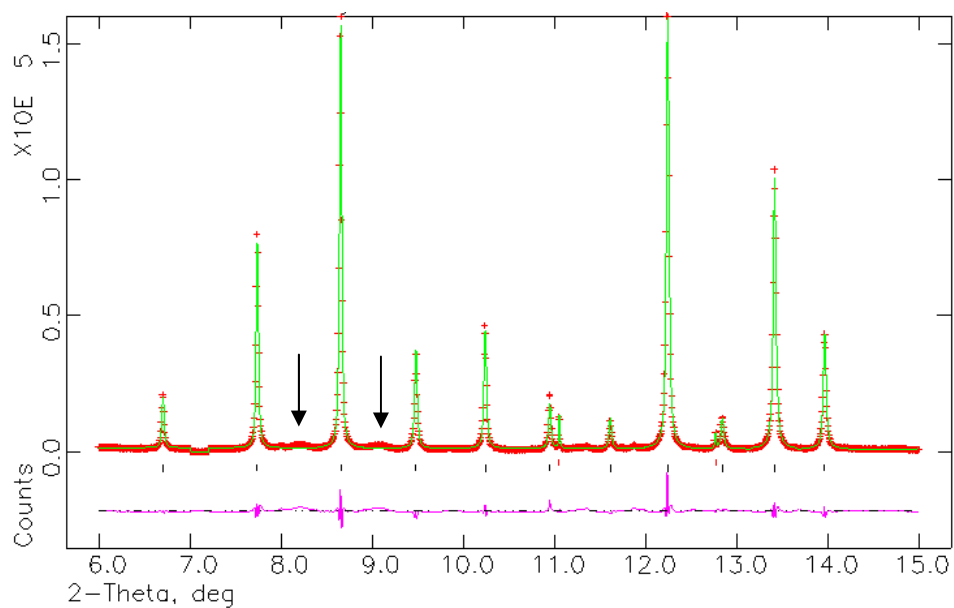

**Figure 2S.** Final observed (crosses), calculated (full line) and difference (lower full line) diffraction profiles ( $\lambda = 0.42704(1) \text{ \AA}$ ) over the 6-15° region for IrGe<sub>1.5</sub>Te<sub>1.5</sub>. The broad features that could be indexed on the basis of the ordered skutterudite unit cell are highlighted by arrows.
